# Supplementary material
Source: MDPI journal article supplement (https://www.mdpi.com/2071-1050/13/18/10240)
Supplement: s1 [file s1]

# Development and Characterization of Efficient K-Solubilizing Rhizobacteria and Mesorhizobial Inoculants for Chickpea

Ali Raza Siddiqui<sup>1</sup>, Sher Muhammad Shahzad<sup>1\*</sup>, Muhammad Ashraf<sup>2</sup>, Tahira Yaseem<sup>3</sup>, Rizwana Kausar<sup>4</sup>, Gadah albasher<sup>5</sup>, Saad Alkahtani<sup>5</sup>, Awais Shakoor<sup>6\*</sup>

<sup>1</sup>Department of Soil and Environmental Sciences, College of Agriculture, University of Sargodha, Sargodha, Punjab, Pakistan

<sup>2</sup>Department of Soil Science, Faculty of Agricultural Sciences and Technology, Bahauddin Zakariya University, Multan, Punjab, Pakistan

<sup>3</sup>Department of Environmental Sciences and Engineering, GC, University Faisalabad, Punjab, Pakistan

<sup>4</sup>Soil and Water Testing Laboratory for Research, Sargodha, Punjab, Pakistan

<sup>5</sup>Department of Zoology, College of Science, King Saud University, Riyadh, Saudi Arabia

<sup>6</sup>Department of Environment and Soil Sciences, University of Lleida, Avinguda Alcalde Rovira Roure 191, 25198, Lleida, Spain

\*Corresponding author's email: smshahzad\_pk@yahoo.com; awais.shakoor@udl.cat

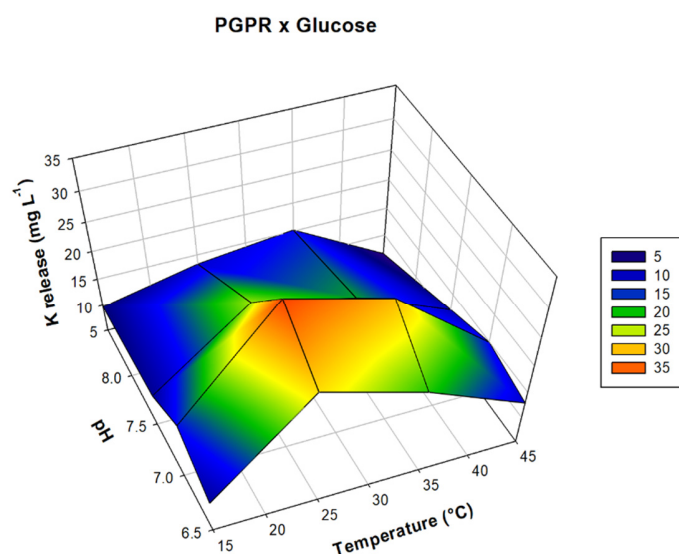

**Figure S1.** 3D relationship between glucose (C source), temperature (°C), pH and K release from waste mica (WM) powder 3D Stoichiometric relationships = 3D stoichiometric relationships = Glucose and pH:  $R^2 = 7730$ ,  $p < 0001$ ,  $n = 0032$ ; Glucose and temperature (°C):  $R^2 = 7730$ ,  $p < 0001$ ,  $n = 0002$ , pH and temperature (°C):  $R^2 = 7730$ ,  $p < 0001$ ,  $n = 0341$

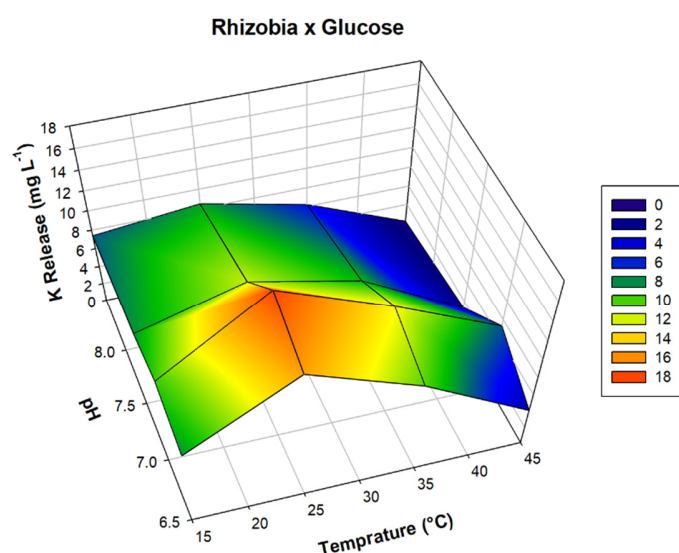

**Figure S2.** 3D relationship between glucose (C source), temperature (°C), pH and K release from waste mica (WM) powder 3D Stoichiometric relationships = 3D

stoichiometric relationships = Glucose and pH:  $R^2 = 7730$ ,  $p < 0001$ ,  $n = 0032$ ; Glucose and temperature ( $^{\circ}\text{C}$ ):  $R^2 = 7730$ ,  $p < 0001$ ,  $n = 0002$ , pH and temperature ( $^{\circ}\text{C}$ ):  $R^2 = 7730$ ,  $p < 0001$ ,  $n = 0341$

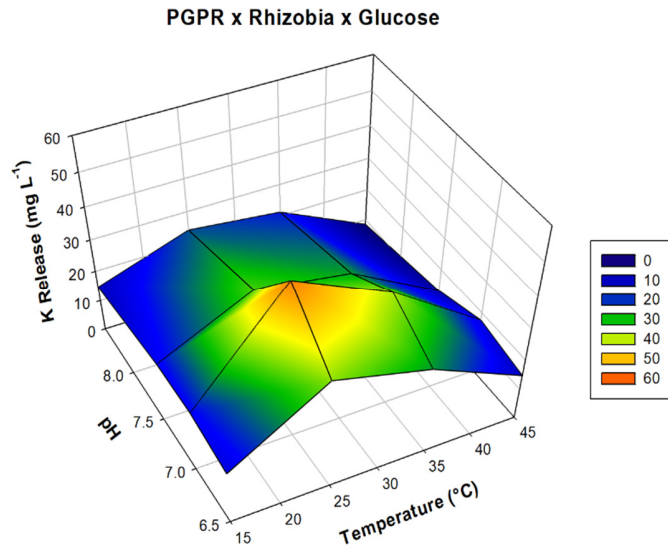

**Figure S3.** 3D relationship between glucose (C source), temperature ( $^{\circ}\text{C}$ ), pH and K release from waste mica (WM) powder 3D Stoichiometric relationships = 3D stoichiometric relationships = Glucose and pH:  $R^2 = 7730$ ,  $p < 0001$ ,  $n = 0032$ ; Glucose and temperature ( $^{\circ}\text{C}$ ):  $R^2 = 7730$ ,  $p < 0001$ ,  $n = 0002$ , pH and temperature ( $^{\circ}\text{C}$ ):  $R^2 = 7730$ ,  $p < 0001$ ,  $n = 0341$

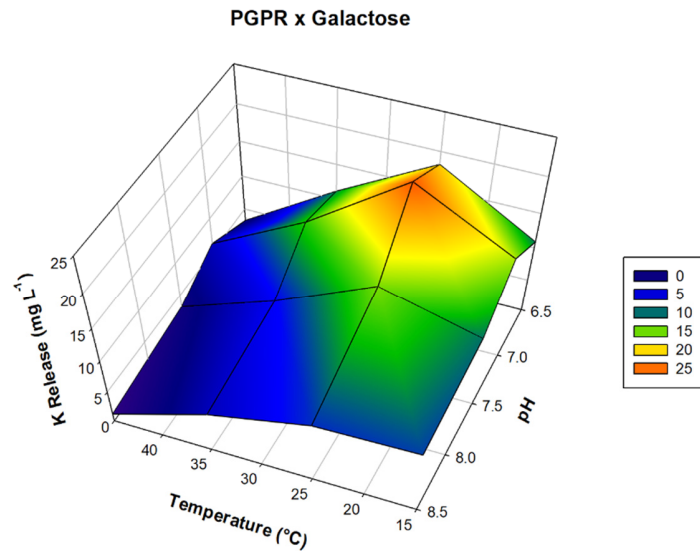

**Figure S4.** 3D relationship between glucose (C source), temperature (°C), pH and K release from waste mica (WM) powder 3D Stoichiometric relationships = 3D stoichiometric relationships = Glucose and pH:  $R^2 = 7730$ ,  $p < 0001$ ,  $n = 0032$ ; Glucose and temperature (°C):  $R^2 = 7730$ ,  $p < 0001$ ,  $n = 0002$ , pH and temperature (°C):  $R^2 = 7730$ ,  $p < 0001$ ,  $n = 0341$

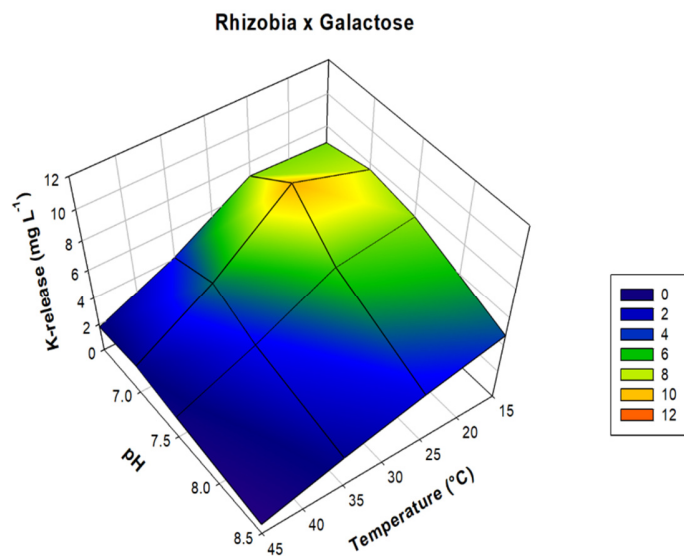

**Figure S5.** 3D relationship between glucose (C source), temperature (°C), pH and K release from waste mica (WM) powder 3D Stoichiometric relationships = 3D stoichiometric relationships = Glucose and pH:  $R^2 = 7730$ ,  $p < 0001$ ,  $n = 0032$ ; Glucose and

temperature (°C):  $R^2 = 7730$ ,  $p < 0001$ ,  $n = 0002$ , pH and temperature (°C):  $R^2 = 7730$ ,  $p < 0001$ ,  $n = 0341$

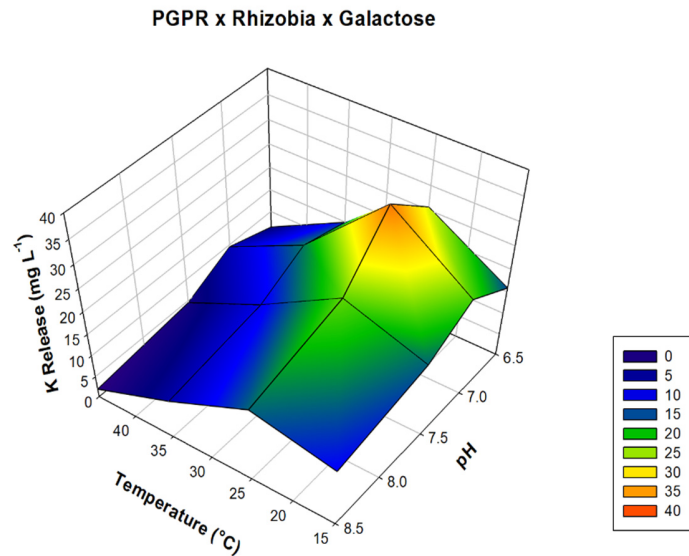

**Figure S6.** 3D relationship between glucose (C source), temperature (°C), pH and K release from waste mica (WM) powder 3D Stoichiometric relationships = 3D stoichiometric relationships = Glucose and pH:  $R^2 = 7730$ ,  $p < 0001$ ,  $n = 0032$ ; Glucose and temperature (°C):  $R^2 = 7730$ ,  $p < 0001$ ,  $n = 0002$ , pH and temperature (°C):  $R^2 = 7730$ ,  $p < 0001$ ,  $n = 0341$

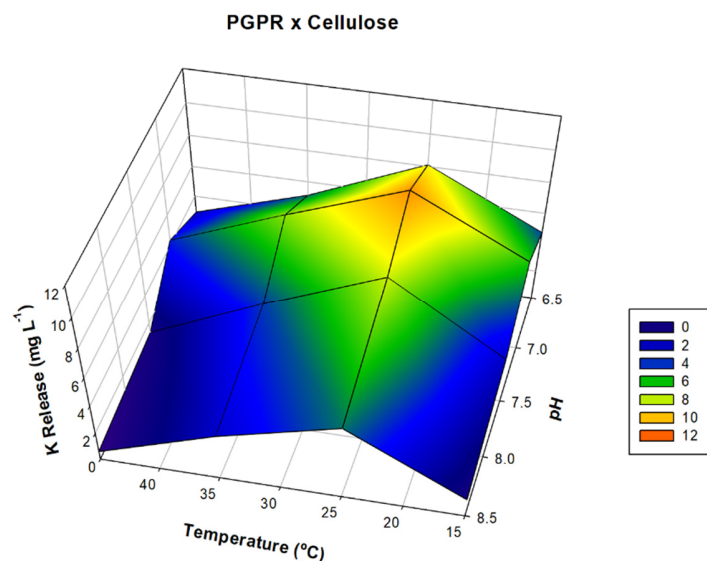

**Figure S7.** 3D relationship between glucose (C source), temperature (°C), pH and K release from waste mica (WM) powder 3D Stoichiometric relationships = 3D stoichiometric relationships = Glucose and pH:  $R^2 = 7730$ ,  $p < 0001$ ,  $n = 0032$ ; Glucose and temperature (°C):  $R^2 = 7730$ ,  $p < 0001$ ,  $n = 0002$ , pH and temperature (°C):  $R^2 = 7730$ ,  $p < 0001$ ,  $n = 0341$

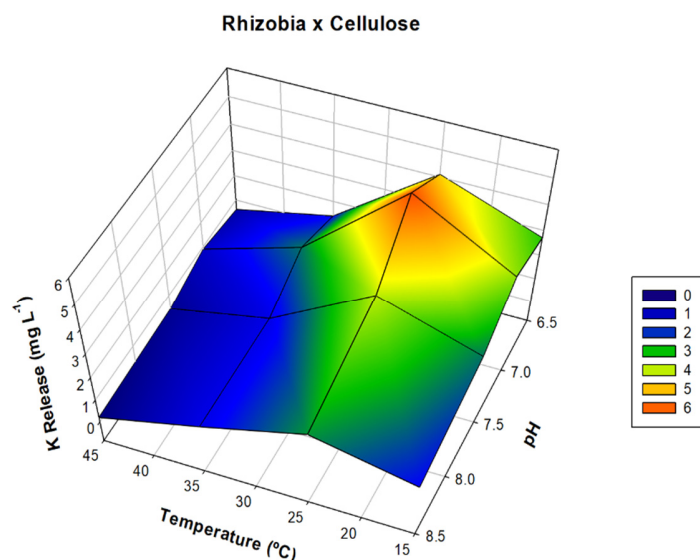

**Figure S8.** 3D relationship between glucose (C source), temperature (°C), pH and K release from waste mica (WM) powder 3D Stoichiometric relationships = 3D stoichiometric relationships = Glucose and pH:  $R^2 = 7730$ ,  $p < 0001$ ,  $n = 0032$ ; Glucose and

temperature (°C):  $R^2 = 7730$ ,  $p < 0001$ ,  $n = 0002$ , pH and temperature (°C):  $R^2 = 7730$ ,  $p < 0001$ ,  $n = 0341$

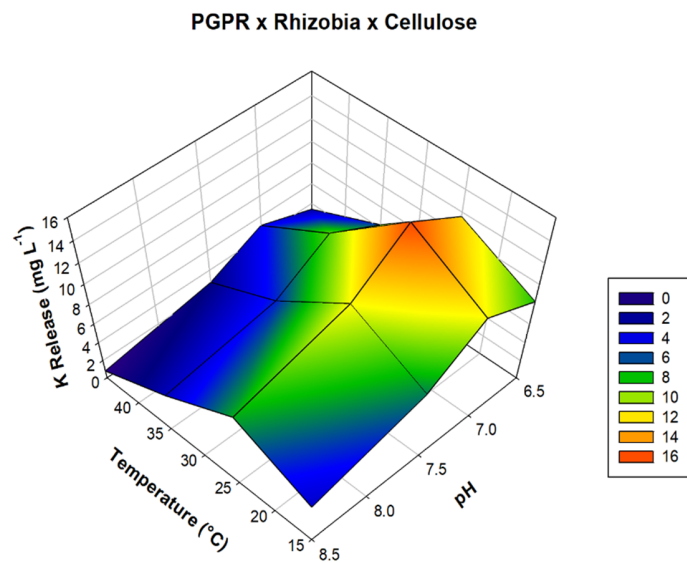

**Figure S9.** 3D relationship between glucose (C source), temperature (°C), pH and K release from waste mica (WM) powder 3D Stoichiometric relationships = 3D Stoichiometric relationships = Glucose and pH:  $R^2 = 7730$ ,  $p < 0001$ ,  $n = 0032$ ; Glucose and temperature (°C):  $R^2 = 7730$ ,  $p < 0001$ ,  $n = 0002$ , pH and temperature (°C):  $R^2 = 7730$ ,  $p < 0001$ ,  $n = 0341$
